# Supplementary material for: MAVS Deficiency Is Associated With a Reduced T Cell Response Upon Secondary RSV Infection in Mice
Source: PubMed Central journal article supplement (PMC7573121; doi:10.3389/fimmu.2020.572747), 2020-10-06
Supplement: DataSheet_1.pdf [file DataSheet_1.pdf]

## Supplementary Material

### a Surface staining

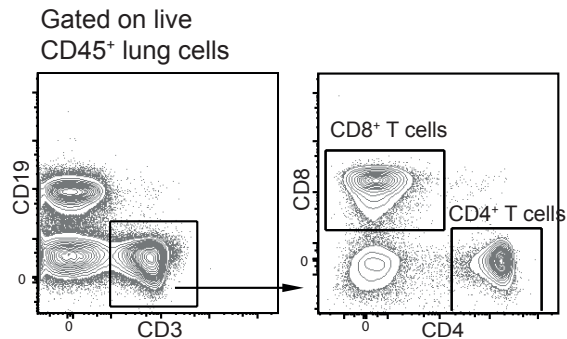

### b Intracellular IFN- $\gamma$ and Granzyme B staining, and M-tetramer staining

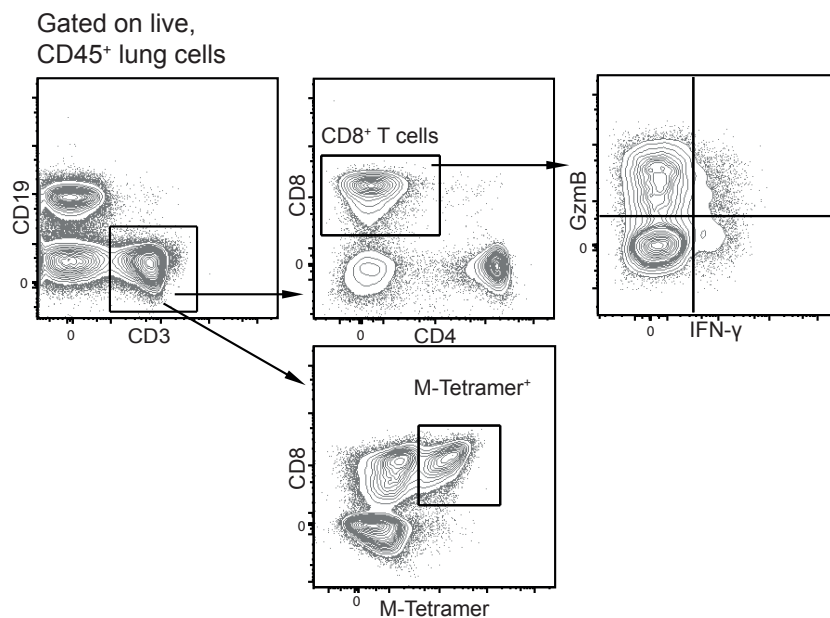

**Supplemental Figure 1. Gating strategy to identify lung and BAL T cell populations.** Mice were infected with RSV. Cells were obtained from airways by bronchoalveolar lavage and from lung tissue by collagenase digestion and stained for the indicated cell markers. **(a)** After gating on non-debris, singlets, live and CD45<sup>+</sup> cells, the gating strategy as shown was used to identify CD8<sup>+</sup> and CD4<sup>+</sup> T cells. **(b)** After gating on non-debris, singlets, live and CD45<sup>+</sup> cells, the gating strategy as shown was used to identify effector molecules produced by CD8<sup>+</sup> T cells using intracellular staining for Gzmb and IFN- $\gamma$ . To identify RSV-specific CD8<sup>+</sup> T cells, cells were stained with tetramers containing the immunodominant peptide M<sub>187-195</sub>.

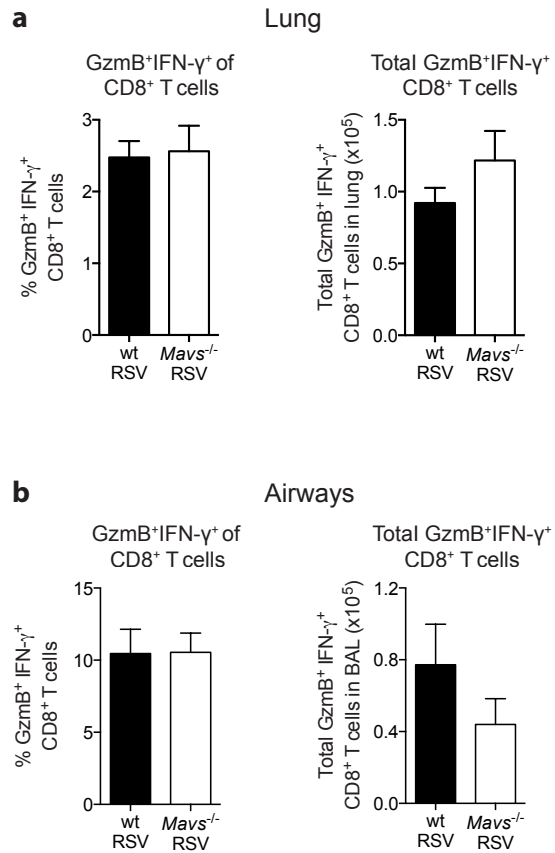

**Supplemental Figure 2.** Frequency and total number of multifunctional (Granzyme B (GzmB) and IFN- $\gamma$  producing) CD8<sup>+</sup> T cells in **(a)** lung tissue and **(b)** airways on day 8 p.i. in RSV-infected wt and *Mavs*<sup>-/-</sup> mice, was determined by flow cytometry. Data are represented as mean  $\pm$  SEM and are pooled from two independent experiments, n=5-10.

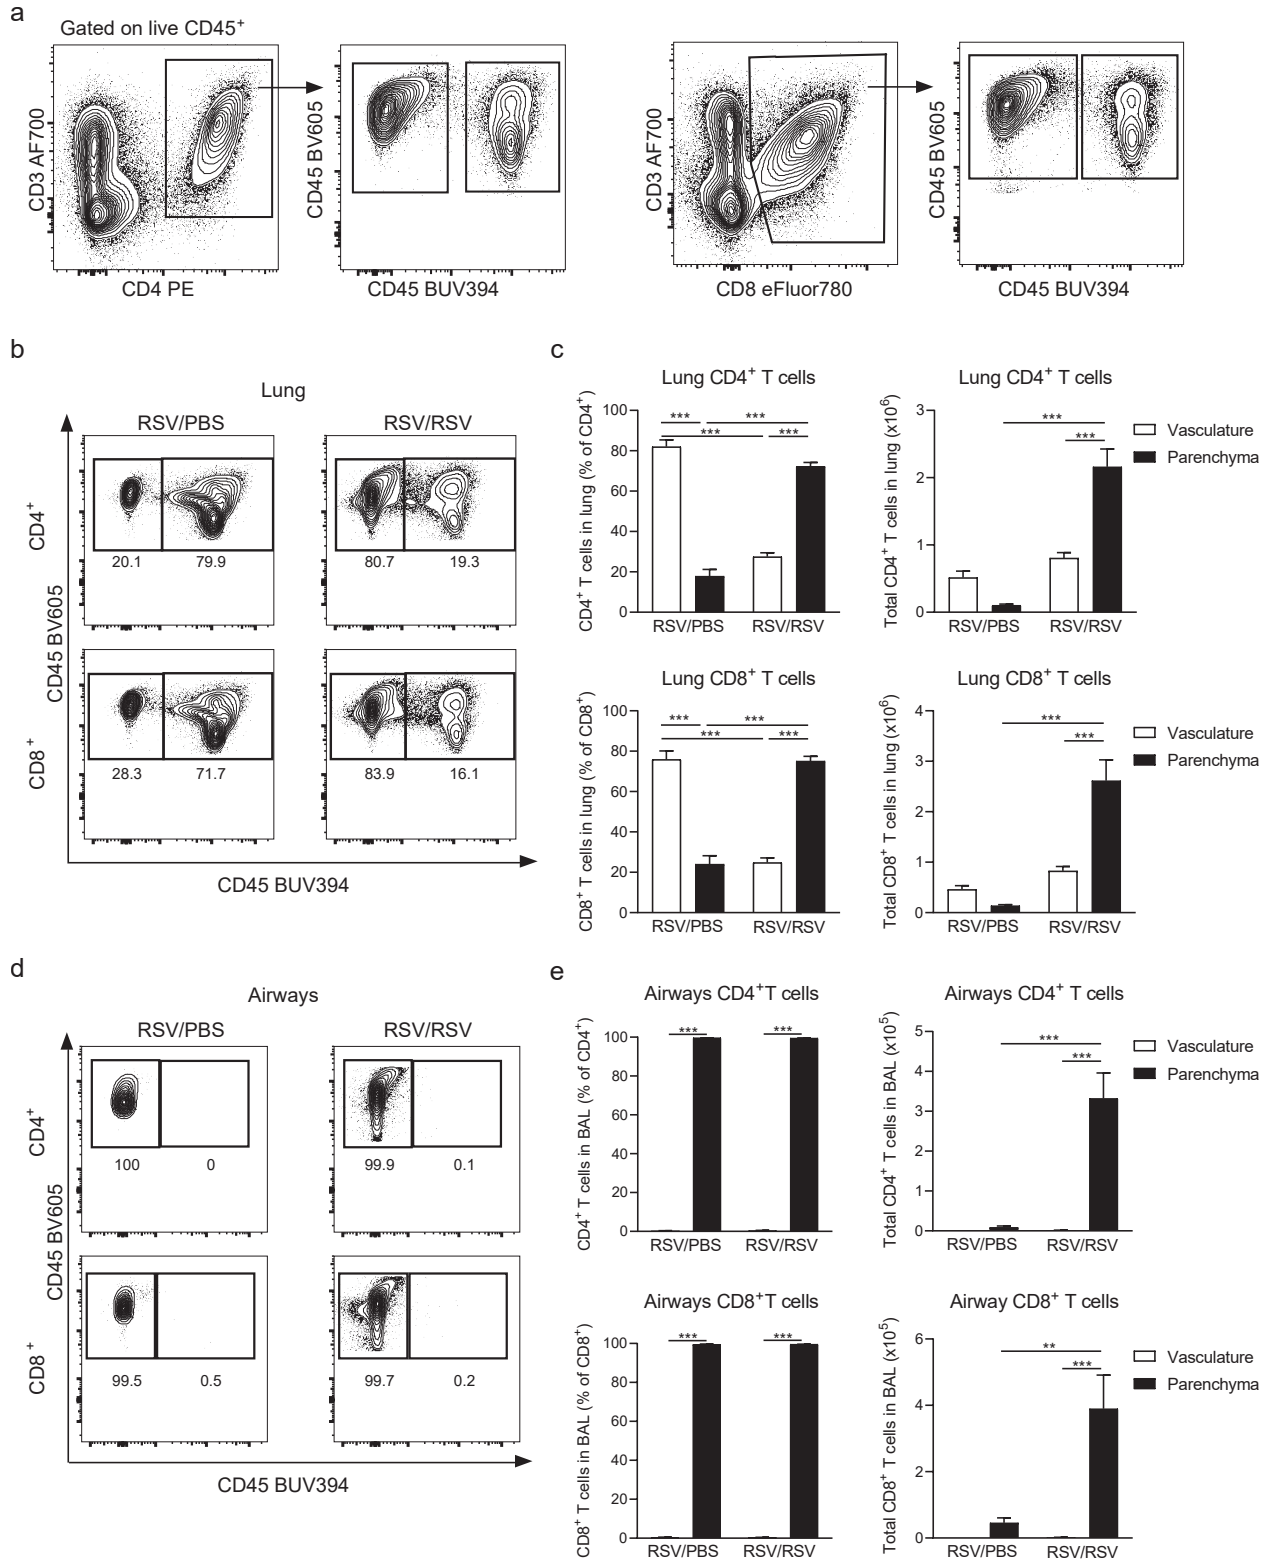

**Supplemental Figure 3.** C57BL/6 mice were re-infected with RSV (RSV/RSV) or mock-infected (RSV/PBS) 21 days after primary RSV infection. At day 4 post re-infection mice were culled 10 minutes after intravenous injection with anti-CD45 antibody conjugated with BUV395 for discerning intravenous cells (BUV395<sup>+</sup> and BV605<sup>+</sup>) from lung resident cells BV605<sup>+</sup>. **(a)** Gating strategy for

identification of CD4<sup>+</sup> and CD8<sup>+</sup> T cells in the parenchyma or vasculature by flow cytometry. **(b)** Representative dot plots for CD4<sup>+</sup> and CD8<sup>+</sup> T cells harvested from the lung. **(c)** Frequency and total number of CD4<sup>+</sup> or CD8<sup>+</sup> T cells in the vasculature or lung parenchyma. **(d)** Representative dot plots for CD4<sup>+</sup> and CD8<sup>+</sup> T cells recovered from BAL. **(e)** Frequency and total number of CD4<sup>+</sup> or CD8<sup>+</sup> T cells in the airways. Data are presented as mean  $\pm$  SEM of five mice per group and are representative of two independent experiment. Statistical significances of differences between groups were determined by one-way ANOVA with Tukey's post hoc test. \*, P < 0.05; \*\*, P < 0.01; \*\*\*, P < 0.001.

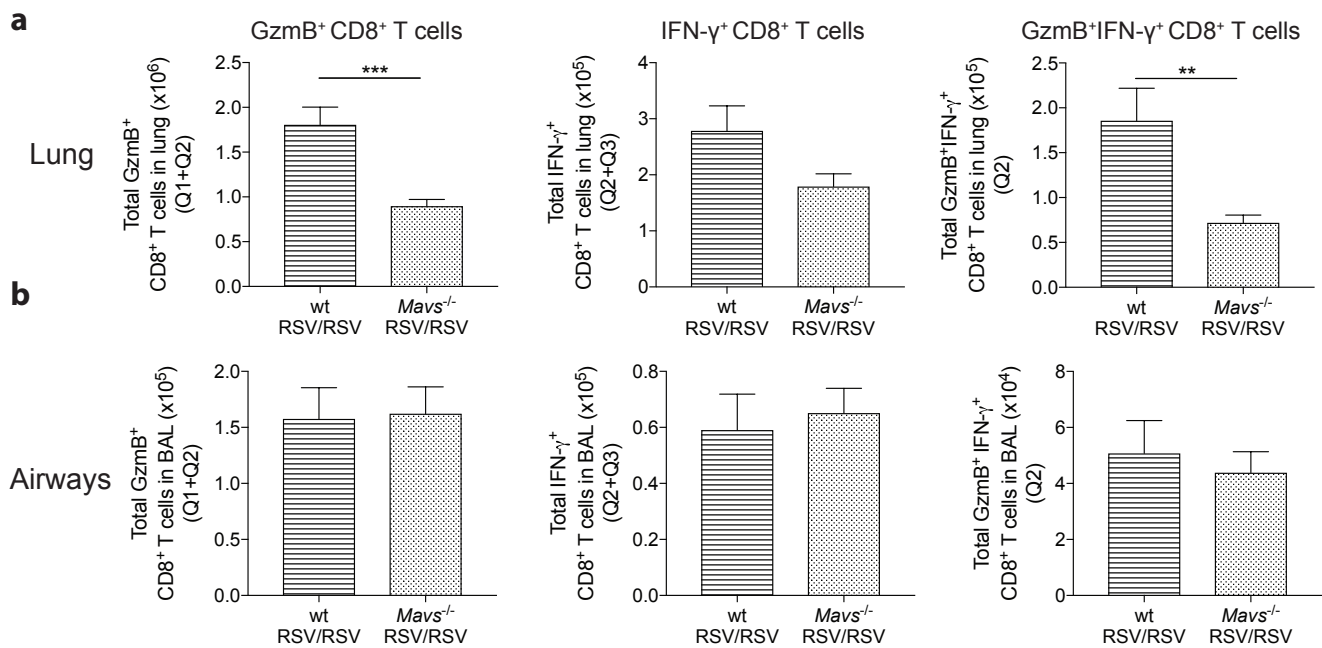

**Supplemental Figure 4. Fewer GzmB and IFN- $\gamma$ /GzmB producing T cells in the lung of *Mavs*<sup>-/-</sup> mice during secondary RSV infection.** Total CD8<sup>+</sup> T cells expressing GzmB and/or IFN- $\gamma$  were quantified in **(a)** the lung tissue or **(b)** airways of wt and *Mavs*<sup>-/-</sup> mice re-challenged with RSV (RSV/RSV). Data are represented as mean  $\pm$  SEM and pooled from two independent experiments, n=5-10. Statistical significances of differences between groups were determined by unpaired student's *t* test.
